# Supplementary material for: River Extraction under Bankfull Discharge Conditions Based on Sentinel-2 Imagery and DEM Data
Source: MDPI journal article supplement (doi:10.3390/rs13142650), 2021-07-06
Supplement: s1 [file s1]

**Table S1\***. Basic information of the cross sections located in the upper Yellow River Basin.

| Station ID | River names     | Cross section names | Flow to         | Longitude (°) | Latitude (°) | Altitude (m) | Contributing area (×10 <sup>4</sup> km <sup>2</sup> ) | Distance to estuary (km) | Cross sections used to extract river widths | Cross sections of the mainstream (reservoir effect removed) | Annual peak discharge used to calculate flood frequency |
|------------|-----------------|---------------------|-----------------|---------------|--------------|--------------|-------------------------------------------------------|--------------------------|---------------------------------------------|-------------------------------------------------------------|---------------------------------------------------------|
| 1          | Heilin River    | Heilin2(HL2)        | Beichuan River  | 101.400       | 37.083       | 2760         | 0.028                                                 | 21                       |                                             |                                                             |                                                         |
| 2          | Yellow River    | Huangheyan4(HHY4)   | Bohai Sea       | 98.169        | 34.890       | 4214         | 2.093                                                 | 5194                     | √                                           | √                                                           | 1967-2018                                               |
| 3          | Yellow River    | Jimai4(JM4)         | Bohai Sea       | 99.650        | 33.767       | 3959         | 4.502                                                 | 4869                     | √                                           | √                                                           | 1967-2018                                               |
| 4          | Yellow River    | Mentang(MT)         | Bohai Sea       | 101.046       | 33.767       | 3636         | 5.966                                                 | 4618                     | √                                           | √                                                           | 2007-2018                                               |
| 5          | Yellow River    | Maqu2(MQ2)          | Bohai Sea       | 102.083       | 33.958       | 3412         | 8.605                                                 | 4284                     | √                                           | √                                                           | 1967-2018                                               |
| 6          | Yellow River    | Jungong(JG)         | Bohai Sea       | 100.651       | 34.688       | 3081         | 9.841                                                 | 4057                     | √                                           | √                                                           | 1982-2018                                               |
| 7          | Yellow River    | Tangnaihai(TNH)     | Bohai Sea       | 100.150       | 35.500       | 2689         | 12.197                                                | 3911                     | √                                           | √                                                           | 1967-2018                                               |
| 8          | Yellow River    | Guide2(GD2)         | Bohai Sea       | 101.405       | 36.045       | 2200         | 13.365                                                | 3722                     | √                                           |                                                             | 1967-2018                                               |
| 9          | Yellow River    | Xunhua3(XH3)        | Bohai Sea       | 102.450       | 35.868       | 1864         | 14.533                                                | 3563                     | √                                           |                                                             | 1967-2018                                               |
| 10         | Yellow River    | Xiaochuan(XC)       | Bohai Sea       | 103.333       | 35.933       | 1631         | 18.177                                                | 3442                     | √                                           |                                                             | 1967-2018                                               |
| 11         | Yellow River    | Shangquan6(SQ6)     | Bohai Sea       | 103.245       | 36.027       | 1619         | 18.282                                                | 3409                     | √                                           |                                                             | 1967-2017                                               |
| 12         | Yellow River    | Lanzhou(LZ)         | Bohai Sea       | 103.817       | 36.067       | 1518         | 22.255                                                | 3345                     | √                                           | √                                                           | 1967-2018                                               |
| 13         | Yellow River    | Anningdu (AND)      | Bohai Sea       | 104.683       | 36.583       | 1400         | 24.154                                                | 3208                     | √                                           | √                                                           | 1967-2018                                               |
| 14         | Dong River      | Dingxi(DX)          | Guanchuan River | 104.625       | 35.584       | 1901         | 0.079                                                 | 1.2                      |                                             |                                                             |                                                         |
| 15         | Xi River        | Dingxixihe(DXXH)    | Guanchuan River | 104.603       | 35.563       | 1911         | 0.064                                                 | 2                        |                                             |                                                             |                                                         |
| 16         | Bayan Gou River | Hualong(HL)         | Yellow River    | 102.251       | 36.100       | 2796         | 0.022                                                 | 29                       |                                             |                                                             |                                                         |
| 17         | Bai River       | Tangke(TK)          | Yellow River    | 102.452       | 33.417       | 3428         | 0.537                                                 | 6.3                      | √                                           |                                                             | 1967-2018                                               |
| 18         | Daheba River    | Shangcun(SC)        | Yellow River    | 100.134       | 35.506       | 2694         | 0.398                                                 | 1.8                      |                                             |                                                             |                                                         |
| 19         | Daxia River     | Xiahe2(XH2)         | Yellow River    | 102.484       | 35.182       | 2957         | 0.169                                                 | 144                      |                                             |                                                             |                                                         |
| 20         | Daxia River     | Shuangcheng(SC)     | Yellow River    | 103.050       | 35.483       | 2040         | 0.614                                                 | 55                       | √                                           |                                                             | 1967-2018                                               |
| 21         | Daxia River     | Zheqiao(ZQ)         | Yellow River    | 103.260       | 35.636       | 1835         | 0.684                                                 | 27                       |                                             |                                                             |                                                         |
| 22         | Hei River       | Ruoergai(REG)       | Yellow River    | 102.935       | 33.601       | 3437         | 0.400                                                 | 163                      |                                             |                                                             |                                                         |
| 23         | Hei River       | Dashui(DS)          | Yellow River    | 102.263       | 33.990       | 3427         | 0.742                                                 | 31                       |                                             |                                                             |                                                         |
| 24         | Huangshui River | Haiyan3(HY3)        | Yellow River    | 101.015       | 36.900       | 2995         | 0.138                                                 | 296                      |                                             |                                                             |                                                         |
| 25         | Huangshui River | Huangyuan(HY)       | Yellow River    | 101.267       | 36.682       | 2628         | 0.303                                                 | 254                      | √                                           |                                                             | 2007-2018                                               |
| 26         | Huangshui River | Xining(XN)          | Yellow River    | 101.783       | 36.632       | 2226         | 0.902                                                 | 200                      | √                                           |                                                             | 1967-2018                                               |
| 27         | Huangshui River | Ledu(LD)            | Yellow River    | 102.424       | 36.474       | 1968         | 1.303                                                 | 129                      |                                             |                                                             |                                                         |
| 28         | Huangshui River | Minhe3(MH3)         | Yellow River    | 102.809       | 36.337       | 1761         | 1.534                                                 | 75                       | √                                           |                                                             | 1967-2018                                               |

|    |                     |                       |                |         |        |      |       |     |   |           |
|----|---------------------|-----------------------|----------------|---------|--------|------|-------|-----|---|-----------|
| 29 | Longwu River        | Tongren(TR)           | Yellow River   | 102.022 | 35.516 | 2482 | 0.283 | 44  | √ | 1967-2018 |
| 30 | Qingshui River      | Qingshui(QS)          | Yellow River   | 102.551 | 35.834 | 1884 | 0.069 | 1.2 | √ | 1982-2018 |
| 31 | Qushi'an River      | Damitan(DMT)          | Yellow River   | 100.228 | 35.321 | 2747 | 0.579 | 1.3 |   |           |
| 32 | Requ River          | Huanghe(HH)           | Yellow River   | 98.267  | 34.600 | 4209 | 0.645 | 7   |   |           |
| 33 | Shakequ River       | Jiuzhi(JZ)            | Yellow River   | 101.491 | 33.433 | 3619 | 0.125 | 34  | √ | 2007-2018 |
| 34 | Tao River           | Luqu(LQ)              | Yellow River   | 102.459 | 34.601 | 3121 | 0.504 | 529 | √ | 1982-2018 |
| 35 | Tao River           | Minxian4(MX4)         | Yellow River   | 104.033 | 34.445 | 2303 | 1.411 | 254 | √ | 1967-2018 |
| 36 | Tao River           | Lijiacun2(LJC2)       | Yellow River   | 103.817 | 35.267 | 1911 | 1.969 | 108 |   |           |
| 37 | Tao River           | Hongqi(HQ)            | Yellow River   | 103.567 | 35.800 | 1747 | 2.497 | 27  |   |           |
| 38 | Zhuanglang River    | Tianzhu(TZ)           | Yellow River   | 103.148 | 36.966 | 2384 | 0.162 | 102 |   |           |
| 39 | Zhuanglang River    | Wushengyi3(WSY3)      | Yellow River   | 103.187 | 36.870 | 2272 | 0.200 | 90  |   |           |
| 40 | Zhuanglang River    | Hongyazi(HYZ)         | Yellow River   | 103.444 | 36.184 | 1571 | 0.401 | 1.3 |   |           |
| 41 | Zuli River          | Huining2(HN2)         | Yellow River   | 105.050 | 35.685 | 1715 | 0.099 | 176 |   |           |
| 42 | Zuli River          | Guochengyi(GCY)       | Yellow River   | 104.880 | 36.217 | 1526 | 0.547 | 83  |   |           |
| 43 | Zuli River          | Jingyuan(JY)          | Yellow River   | 104.660 | 36.549 | 1404 | 1.065 | 3.8 |   |           |
| 44 | Bazhou Gou River    | Jijiaobao(JJB)        | Hungshui River | 102.793 | 36.317 | 1803 | 0.019 | 3.6 |   |           |
| 45 | Beichuan River      | Niuchang(NC)          | Hungshui River | 101.350 | 37.256 | 3007 | 0.078 | 98  |   |           |
| 46 | Beichuan River      | Qiaotou5(QT5)         | Hungshui River | 101.684 | 36.934 | 2444 | 0.277 | 37  |   |           |
| 47 | Datong River        | Garide(GRD)           | Hungshui River | 100.517 | 37.749 | 3448 | 0.458 | 372 |   |           |
| 48 | Datong River        | Qingshizui(QSZ)       | Hungshui River | 101.417 | 37.458 | 2935 | 0.801 | 255 |   |           |
| 49 | Datong River        | Tiantang(TT)          | Hungshui River | 102.498 | 36.950 | 2276 | 1.257 | 100 |   |           |
| 50 | Datong River        | Liancheng2(LC2)       | Hungshui River | 102.817 | 36.602 | 1922 | 1.391 | 40  |   |           |
| 51 | Datong River        | Xiangtang3(XT3)       | Hungshui River | 102.833 | 36.350 | 1742 | 1.513 | 1.9 |   |           |
| 52 | Nanchuan River      | Nanchuanhekou2(NCHK2) | Hungshui River | 101.774 | 36.626 | 2244 | 0.040 | 1.3 |   |           |
| 53 | Shatang Chuan River | Fujiazhai(FJZ)        | Hungshui River | 101.874 | 36.573 | 2185 | 0.111 | 1.7 |   |           |
| 54 | Xina Chuan River    | Xinachuan2(XNC)       | Hungshui River | 101.483 | 36.767 | 2484 | 0.081 | 14  |   |           |
| 55 | Xiaonan Chuan River | Wangjiazhuang(WJZ)    | Hungshui River | 101.936 | 36.550 | 2168 | 0.037 | 0.5 |   |           |
| 56 | Yaoshui River       | Dongjiazhuang3(DJZ3)  | Hungshui River | 101.273 | 36.667 | 2639 | 0.064 | 1.6 |   |           |
| 57 | Yinsheng Gou River  | Baliqiao3(BLQ3)       | Hungshui River | 102.409 | 36.517 | 2066 | 0.046 | 6.9 |   |           |
| 58 | Suji River          | Kangle(KL)            | Sancha River   | 103.700 | 35.375 | 2005 | 0.033 | 1.5 |   |           |
| 59 | Bola River          | Xiabagou-bo3(XBG-B3)  | Tao River      | 102.997 | 34.711 | 2795 | 0.170 | 0.7 |   |           |
| 60 | Dayu Gou River      | Duoba(DB)             | Tao River      | 103.589 | 34.567 | 2500 | 0.078 | 1.7 |   |           |
| 61 | Dongyu Gou River    | Yaodian(YD)           | Tao River      | 104.052 | 35.301 | 2042 | 0.027 | 31  |   |           |

|    |                    |                 |                |         |        |      |       |     |
|----|--------------------|-----------------|----------------|---------|--------|------|-------|-----|
| 62 | Dongyu Gou River2  | Lintao3(LT3)    | Tao River      | 103.868 | 35.401 | 1881 | 0.058 | 2.9 |
| 63 | Guangtong River    | Sanjiaji2(SJJ2) | Tao River      | 103.733 | 35.554 | 1840 | 0.152 | 6.7 |
| 64 | Manba River        | Wangjiamo(WJM)  | Tao River      | 103.833 | 35.248 | 1936 | 0.046 | 1.2 |
| 65 | Yemu River         | Yeliguan2(YLG2) | Tao River      | 103.667 | 34.961 | 2182 | 0.119 | 14  |
| 66 | Xinglong River     | Yuzhong2(YZ2)   | Wanchuan River | 104.064 | 35.800 | 2196 | 0.008 | 15  |
| 67 | Qiechang Gou River | Qieyang(QZ)     | Yinchuan River | 102.959 | 35.637 | 2062 | 0.047 | 4.8 |
| 68 | Guanchuan River    | Dayangying(DYY) | Zuli River     | 104.865 | 36.217 | 1529 | 0.348 | 8   |

\*Revised from Table S1 and Table S2 of Qin et al. (2021).
